# Supplementary material for: Low expression of KIF20A suppresses cell proliferation, promotes chemosensitivity and is associated with better prognosis in HCC
Source: publisher site journal article supplement (doi:10.18632/aging.203494), 2021-09-06
Supplement: Supplementary file [file aging-v13i18-203494-supplementary-material-SD1.pdf]

SUPPLEMENTARY FIGURES

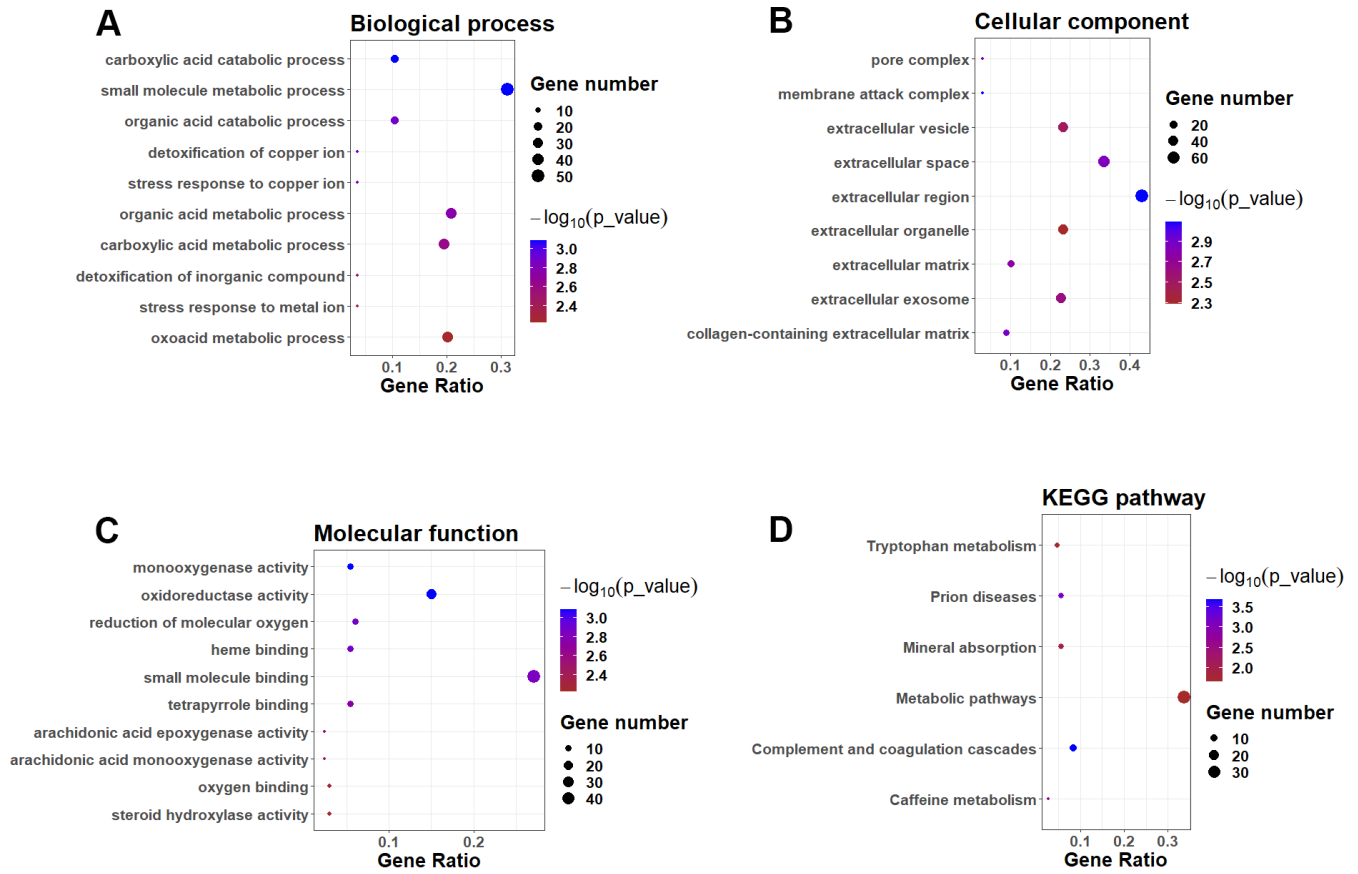

**Supplementary Figure 1. Functional enrichment analysis of common DEGs.** GO enrichment of common DEGs in (A) biological process, (B) cellular component and (C) molecular function. (D) KEGG pathway enrichment analysis of common DEGs.

## Expression pattern of input genes in Liver hepatocellular carcinoma (LIHC)

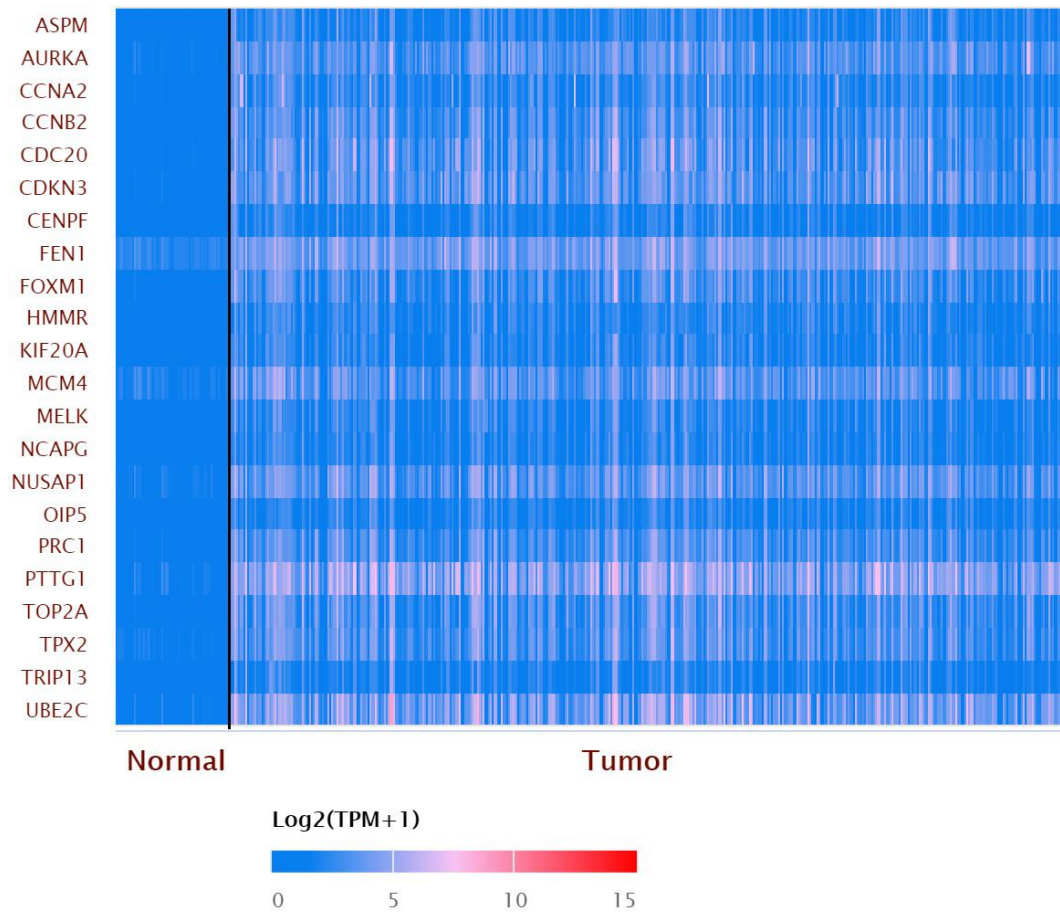

**Supplementary Figure 2.** Heatmap illustrates the expression pattern of hub genes in normal liver tissues and HCC tissues. TPM = transcripts per million.
